# Supplementary material
Source: PubMed Central journal article supplement (PMC3644947)
Supplement: NIHMS465825-supplement-Supplementary_figure_3.pdf [file NIHMS465825-supplement-Supplementary_figure_3.pdf]

**Supplementary Figure 3: Bicarbonate activation of cyanobacterial sAC (CyaC) is pH-independent.**

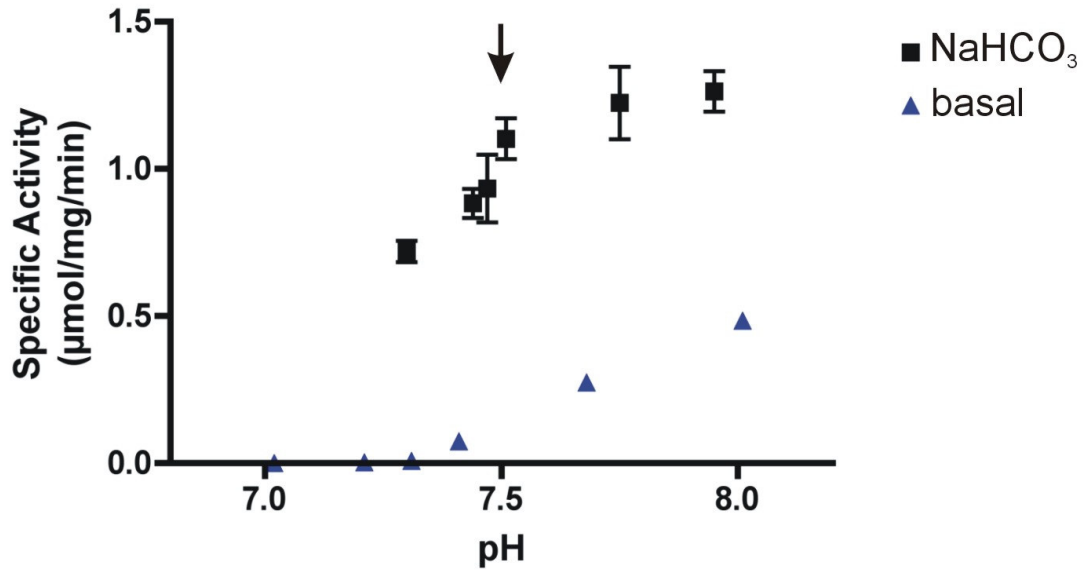

**Supplementary Fig. 3** Bicarbonate activation of cyanobacterial sAC (CyaC) is pH-independent. Bicarbonate induces an increase in CyaC activity at all pH values tested; this effect is independent from the observed pH-related changes in enzyme activity. CyaC activity was assayed in absence ( $\blacktriangle$ ) or presence of 40 mM bicarbonate ( $\blacksquare$ ) at varying pH. The graphed values indicate pH values measured in the final assay solutions. All assays contained 5 mM ATP and 10 mM MgCl<sub>2</sub>, and the activity values shown are averages of triplicate determinations. The pH value of the bicarbonate solution used for crystal soaking experiments (pH 7.5) is indicated by an arrow.
