# Supplementary material
Source: PubMed Central journal article supplement (PMC3644947)
Supplement: NIHMS465825-supplement-Supplementary_figure_6.pdf [file NIHMS465825-supplement-Supplementary_figure_6.pdf]

**Supplementary Table 1: Effect of pH changes and different anions on cyanobacterial sAC (CyaC) activity in solution and on CyaC crystals.**

| <b>Compound added</b>                    | <b>CyaC activation</b> | <b>Effect on CyaC crystals</b> |
|------------------------------------------|------------------------|--------------------------------|
| Reference<br>(no compound added, pH 7.5) | -                      | ---                            |
| Ammonium nitrate (100 mM)                | -                      | no effect                      |
| Sodium phosphate (100 mM)                | -                      | no effect                      |
| Sodium acetate (100 mM)                  | -                      | no effect                      |
| bicarbonate (100 mM), pH 7.5             | +                      | crystals dissolve              |
| bicarbonate (50 mM), pH 7.5              | +                      | crystals dissolve              |
| pH 7.5 (100 mM Tris/HCl)                 | -                      | no effect                      |
| bicarbonate (100 mM), pH 6.5             | +                      | crystals dissolve              |
| pH 6.6 (100 mM Cacodylate)               | -                      | no effect                      |
